# Supplementary material
Source: PubMed Central journal article supplement (PMC8705619)
Supplement: mmc1.pdf [file mmc1.pdf]

# Hand Surgery Education Survey

Thank you for participating in the Hand Surgery Virtual Curriculum!

To better understand the efficacy of this offering and to make improvements for any future virtual educational offerings, we ask that you please take this anonymous online survey.

The survey will take approximately 5 minutes to complete.

Thank you for your consideration.

- 
- 1 Year in training
- PGY 1
  - PGY 2
  - PGY 3
  - PGY 4
  - PGY 5
  - Resident - PGY 6
  - Fellow

- 
- 1 Type of training
- Orthopedic residency
  - Plastic surgery residency
  - Hand surgery fellowship

- 
- Type of training institution?
- Academic/University
  - Private practice with academic affiliation ("Privademic")
  - Community based program

## At your current training program, how often are the following educational tools used for learning?

|                                                | Faculty led           | Fellow led            | Self directed         |
|------------------------------------------------|-----------------------|-----------------------|-----------------------|
| Reading (articles and textbook chapters)       | <input type="radio"/> | <input type="radio"/> | <input type="radio"/> |
| Webinars (Hand-E, ASSH)                        | <input type="radio"/> | <input type="radio"/> | <input type="radio"/> |
| Didactic Lectures                              | <input type="radio"/> | <input type="radio"/> | <input type="radio"/> |
| Case Discussions                               | <input type="radio"/> | <input type="radio"/> | <input type="radio"/> |
| Surgical skills lab and/or cadaver dissections | <input type="radio"/> | <input type="radio"/> | <input type="radio"/> |

- 
- How did you view the Mayo Clinic virtual conferences?
- YouTube
  - Live
  - Both

**What did you find to be the most accessible and effective method to view the various educational offerings?**

|                                 | Phone                 | Tablet                | Laptop computer       | Desktop computer      | Did not use           |
|---------------------------------|-----------------------|-----------------------|-----------------------|-----------------------|-----------------------|
| Assigned selected articles      | <input type="radio"/> |
| Assigned Hand-E lectures        | <input type="radio"/> |
| Mayo Clinic virtual conferences | <input type="radio"/> |

**After viewing the virtual conferences, what is your preference for the various conference formats to optimize your learning?**

|                                | In person             | Online, in real time, able to ask questions, on a set schedule | Online, pre-recorded, unable to ask questions, on your own schedule |
|--------------------------------|-----------------------|----------------------------------------------------------------|---------------------------------------------------------------------|
| Case based discussion          | <input type="radio"/> | <input type="radio"/>                                          | <input type="radio"/>                                               |
| Topic based lecture (Didactic) | <input type="radio"/> | <input type="radio"/>                                          | <input type="radio"/>                                               |
| Surgical tips and tricks       | <input type="radio"/> | <input type="radio"/>                                          | <input type="radio"/>                                               |
| Panel debate                   | <input type="radio"/> | <input type="radio"/>                                          | <input type="radio"/>                                               |

**How effective were the following virtual conference formats for your learning?**

|                                   | Very effective        | Moderately effective  | Effective             | Moderately ineffective | Very ineffective      |
|-----------------------------------|-----------------------|-----------------------|-----------------------|------------------------|-----------------------|
| Case based discussion             | <input type="radio"/> | <input type="radio"/> | <input type="radio"/> | <input type="radio"/>  | <input type="radio"/> |
| Topic based discussion (Didactic) | <input type="radio"/> | <input type="radio"/> | <input type="radio"/> | <input type="radio"/>  | <input type="radio"/> |
| Surgical tips and tricks          | <input type="radio"/> | <input type="radio"/> | <input type="radio"/> | <input type="radio"/>  | <input type="radio"/> |
| Panel debate                      | <input type="radio"/> | <input type="radio"/> | <input type="radio"/> | <input type="radio"/>  | <input type="radio"/> |

**Conference Format: On average, which level of learning did you achieve after viewing each of the various virtual conference formats? (Select the highest level achieved)**

|                                | I know (list, state, name facts) | I understand (describe, discuss, explain) | I can apply (employ, interpret) | I can analyze (compare, contrast) | I can evaluate (interpret, judge) | I can synthesize (integrate ideas into a new solution) | Did not participate in this module |
|--------------------------------|----------------------------------|-------------------------------------------|---------------------------------|-----------------------------------|-----------------------------------|--------------------------------------------------------|------------------------------------|
| Case based discussion          | <input type="radio"/>            | <input type="radio"/>                     | <input type="radio"/>           | <input type="radio"/>             | <input type="radio"/>             | <input type="radio"/>                                  | <input type="radio"/>              |
| Topic based lecture (Didactic) | <input type="radio"/>            | <input type="radio"/>                     | <input type="radio"/>           | <input type="radio"/>             | <input type="radio"/>             | <input type="radio"/>                                  | <input type="radio"/>              |
| Surgical tips and tricks       | <input type="radio"/>            | <input type="radio"/>                     | <input type="radio"/>           | <input type="radio"/>             | <input type="radio"/>             | <input type="radio"/>                                  | <input type="radio"/>              |
| Panel debate                   | <input type="radio"/>            | <input type="radio"/>                     | <input type="radio"/>           | <input type="radio"/>             | <input type="radio"/>             | <input type="radio"/>                                  | <input type="radio"/>              |

**Specific Modules: For the radial nerve palsy module, what was the highest level you could perform?**

|               | I know (list, state, name facts) | I understand (describe, discuss, explain) | I can apply (employ, interpret) | I can analyze (compare, contrast) | I can evaluate (interpret, judge) | I can synthesize (integrate ideas into a new solution) | Did not participate in this module |
|---------------|----------------------------------|-------------------------------------------|---------------------------------|-----------------------------------|-----------------------------------|--------------------------------------------------------|------------------------------------|
| BEFORE module | <input type="radio"/>            | <input type="radio"/>                     | <input type="radio"/>           | <input type="radio"/>             | <input type="radio"/>             | <input type="radio"/>                                  | <input type="radio"/>              |
| AFTER module  | <input type="radio"/>            | <input type="radio"/>                     | <input type="radio"/>           | <input type="radio"/>             | <input type="radio"/>             | <input type="radio"/>                                  | <input type="radio"/>              |

**Specific Modules: for the ulnar sided wrist pain module, what was the highest level you could perform?**

|               | I know (list, state, name facts) | I understand (describe, discuss, explain) | I can apply (employ, interpret) | I can analyze (compare, contrast) | I can evaluate (interpret, judge) | I can synthesize (integrate ideas into a new solution) | Did not participate in this module |
|---------------|----------------------------------|-------------------------------------------|---------------------------------|-----------------------------------|-----------------------------------|--------------------------------------------------------|------------------------------------|
| BEFORE module | <input type="radio"/>            | <input type="radio"/>                     | <input type="radio"/>           | <input type="radio"/>             | <input type="radio"/>             | <input type="radio"/>                                  | <input type="radio"/>              |
| AFTER module  | <input type="radio"/>            | <input type="radio"/>                     | <input type="radio"/>           | <input type="radio"/>             | <input type="radio"/>             | <input type="radio"/>                                  | <input type="radio"/>              |

**Specific Modules: for the brachial plexus injury module, what was the highest level you could perform?**

|               | I know (list, state, name facts) | I understand (describe, discuss, explain) | I can apply (employ, interpret) | I can analyze (compare, contrast) | I can evaluate (interpret, judge) | I can synthesize (integrate ideas into a new solution) | Did not participate in this module |
|---------------|----------------------------------|-------------------------------------------|---------------------------------|-----------------------------------|-----------------------------------|--------------------------------------------------------|------------------------------------|
| BEFORE module | <input type="radio"/>            | <input type="radio"/>                     | <input type="radio"/>           | <input type="radio"/>             | <input type="radio"/>             | <input type="radio"/>                                  | <input type="radio"/>              |
| AFTER module  | <input type="radio"/>            | <input type="radio"/>                     | <input type="radio"/>           | <input type="radio"/>             | <input type="radio"/>             | <input type="radio"/>                                  | <input type="radio"/>              |

**Specific Modules: for the finger arthritis module, what was the highest level you could perform?**

|               | I know (list, state, name facts) | I understand (describe, discuss, explain) | I can apply (employ, interpret) | I can analyze (compare, contrast) | I can evaluate (interpret, judge) | I can synthesize (integrate ideas into a new solution) | Did not participate in this module |
|---------------|----------------------------------|-------------------------------------------|---------------------------------|-----------------------------------|-----------------------------------|--------------------------------------------------------|------------------------------------|
| BEFORE module | <input type="radio"/>            | <input type="radio"/>                     | <input type="radio"/>           | <input type="radio"/>             | <input type="radio"/>             | <input type="radio"/>                                  | <input type="radio"/>              |
| AFTER module  | <input type="radio"/>            | <input type="radio"/>                     | <input type="radio"/>           | <input type="radio"/>             | <input type="radio"/>             | <input type="radio"/>                                  | <input type="radio"/>              |

**Specific Modules: for the failed carpal tunnel surgery module, what was the highest level you could perform?**

|               | I know (list, state, name facts) | I understand (describe, discuss, explain) | I can apply (employ, interpret) | I can analyze (compare, contrast) | I can evaluate (interpret, judge) | I can synthesize (integrate ideas into a new solution) | Did not participate in this module |
|---------------|----------------------------------|-------------------------------------------|---------------------------------|-----------------------------------|-----------------------------------|--------------------------------------------------------|------------------------------------|
| BEFORE module | <input type="radio"/>            | <input type="radio"/>                     | <input type="radio"/>           | <input type="radio"/>             | <input type="radio"/>             | <input type="radio"/>                                  | <input type="radio"/>              |
| AFTER module  | <input type="radio"/>            | <input type="radio"/>                     | <input type="radio"/>           | <input type="radio"/>             | <input type="radio"/>             | <input type="radio"/>                                  | <input type="radio"/>              |

**Specific Modules: for the PIP fracture-dislocation module, what was the highest level you could perform?**

|               | I know (list, state, name facts) | I understand (describe, discuss, explain) | I can apply (employ, interpret) | I can analyze (compare, contrast) | I can evaluate (interpret, judge) | I can synthesize (integrate ideas into a new solution) | Did not participate in this module |
|---------------|----------------------------------|-------------------------------------------|---------------------------------|-----------------------------------|-----------------------------------|--------------------------------------------------------|------------------------------------|
| BEFORE module | <input type="radio"/>            | <input type="radio"/>                     | <input type="radio"/>           | <input type="radio"/>             | <input type="radio"/>             | <input type="radio"/>                                  | <input type="radio"/>              |
| AFTER module  | <input type="radio"/>            | <input type="radio"/>                     | <input type="radio"/>           | <input type="radio"/>             | <input type="radio"/>             | <input type="radio"/>                                  | <input type="radio"/>              |

**Usage: On average, per weekly module:**

|                                                       | All                   | More than half        | one half              | Less than half        | None                  |
|-------------------------------------------------------|-----------------------|-----------------------|-----------------------|-----------------------|-----------------------|
| How many of the articles did you read?                | <input type="radio"/> |
| How many of the Hand-E videos did you view?           | <input type="radio"/> |
| How many of the Mayo Clinic conferences did you view? | <input type="radio"/> |

In what order did you use the educational materials (selected articles, selected Hand-E lectures, Mayo Clinic conferences)?

- Articles/lectures before conference  
 Articles/lectures after conference  
 No particular order  
 Did not use multiple resources

What is your preferred method of learning basic facts and knowledge?

- Self directed  
 Faculty directed

What is your preferred method of learning advanced concepts for application into practice?

- Self directed  
 Faculty directed

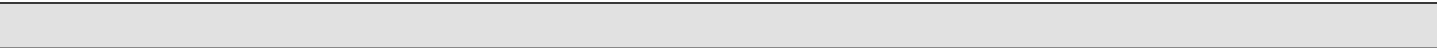

What was the biggest drawback to the virtual curriculum?

---

What was the biggest strength of the virtual curriculum?

---
